# Supplementary material
Source: MDPI journal article supplement (https://www.mdpi.com/2073-4344/14/5/333)
Supplement: s1 [file s1]

# Enhancing the Visible Light Photocatalytic Activity of

## TiO<sub>2</sub>-Based Coatings by the Addition of Exfoliated g-C<sub>3</sub>N<sub>4</sub>

Ilias Papailias<sup>1,\*</sup>, Nadia Todorova<sup>1</sup>, Tatiana Giannakopoulou<sup>1</sup>, Niki Plakantonaki<sup>1</sup>, Michail Vagenas<sup>1</sup>,  
Panagiotis Dallas<sup>1</sup>, George C. Anyfantis<sup>2</sup>, Ioannis Arabatzis<sup>2</sup> and Christos Trapalis<sup>1,\*</sup>

<sup>1</sup> Institute of Nanoscience and Nanotechnology, NCSR “Demokritos”, Patriarchou Gregoriou E & 27 Neapoleos Str., 15341 Agia Paraskevi, Greece;

n.todorova@inn.demokritos.gr (N.T.);

t.giannakopoulou@inn.demokritos.gr (T.G.); n.plakantonaki@inn.demokritos.gr (N.P.);

m.vagenas@inn.demokritos.gr (M.V.); p.dallas@inn.demokritos.gr (P.D.)

<sup>2</sup> NanoPhos S.A., Science and Technology Park of Lavrio, 19500 Lavrio, Greece;

gc.anyfantis@gmail.com (G.C.A.); iarabatz@nanophos.com (I.A.)

\* Correspondence: i.papailias@inn.demokritos.gr (I.P.);

c.trapalis@inn.demokritos.gr (C.T.);

Tel.: +30-210-650-3347 (I.P.); +30-210-650-3343 (C.T.)

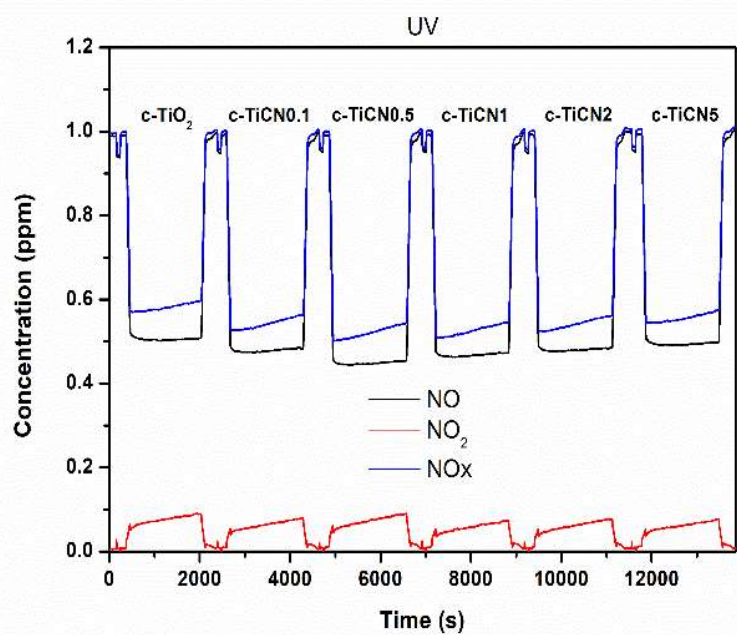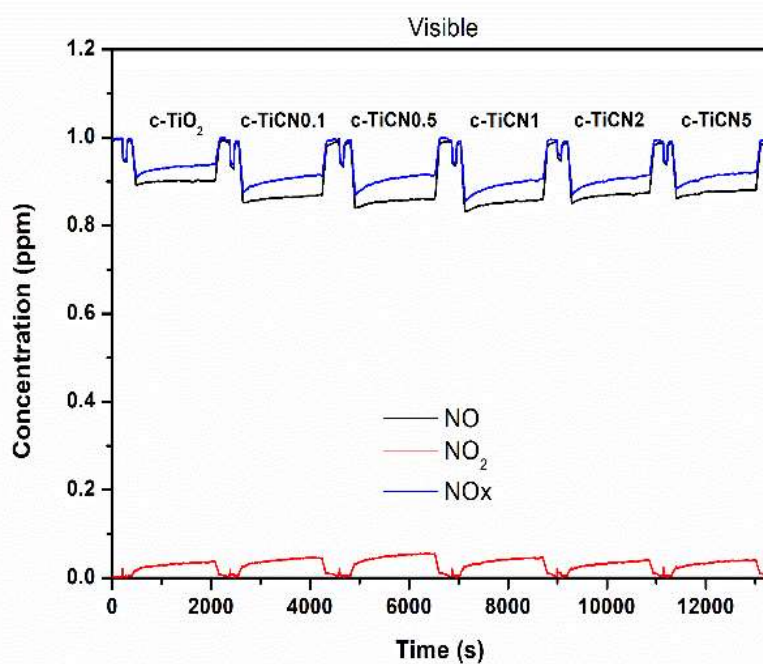

**Figure S1.** Experimental concentration curves of the monitored NO, NO<sub>2</sub> and NO<sub>x</sub> gases under UV (top) and visible light (bottom) irradiation, for the photocatalytic coatings.

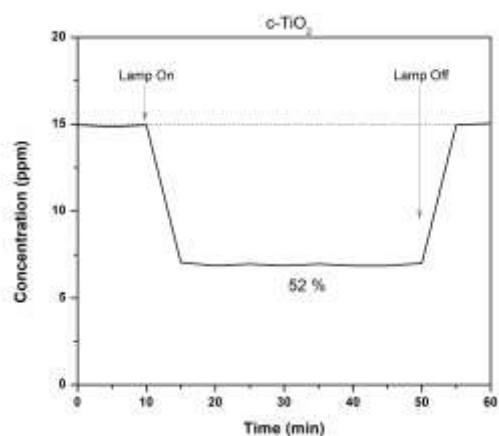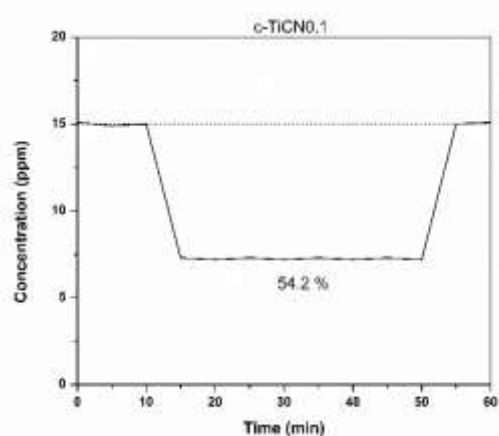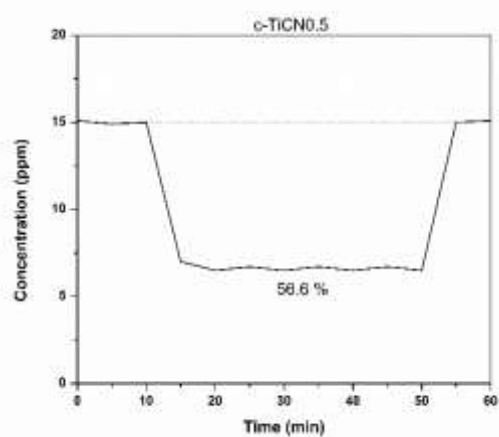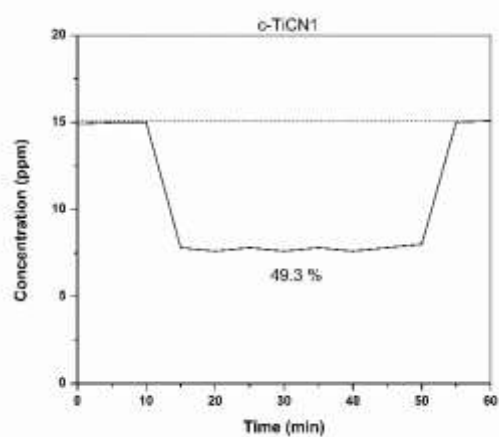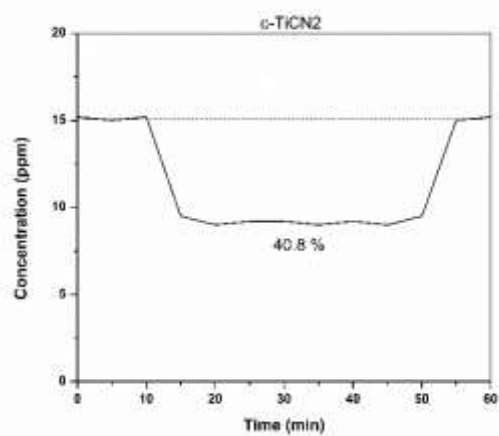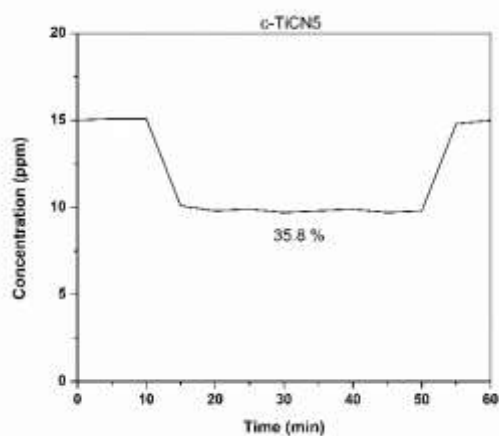

**Figure S2.** Experimental concentration curves of the monitored acetaldehyde gas under UV light irradiation, for the photocatalytic coatings.

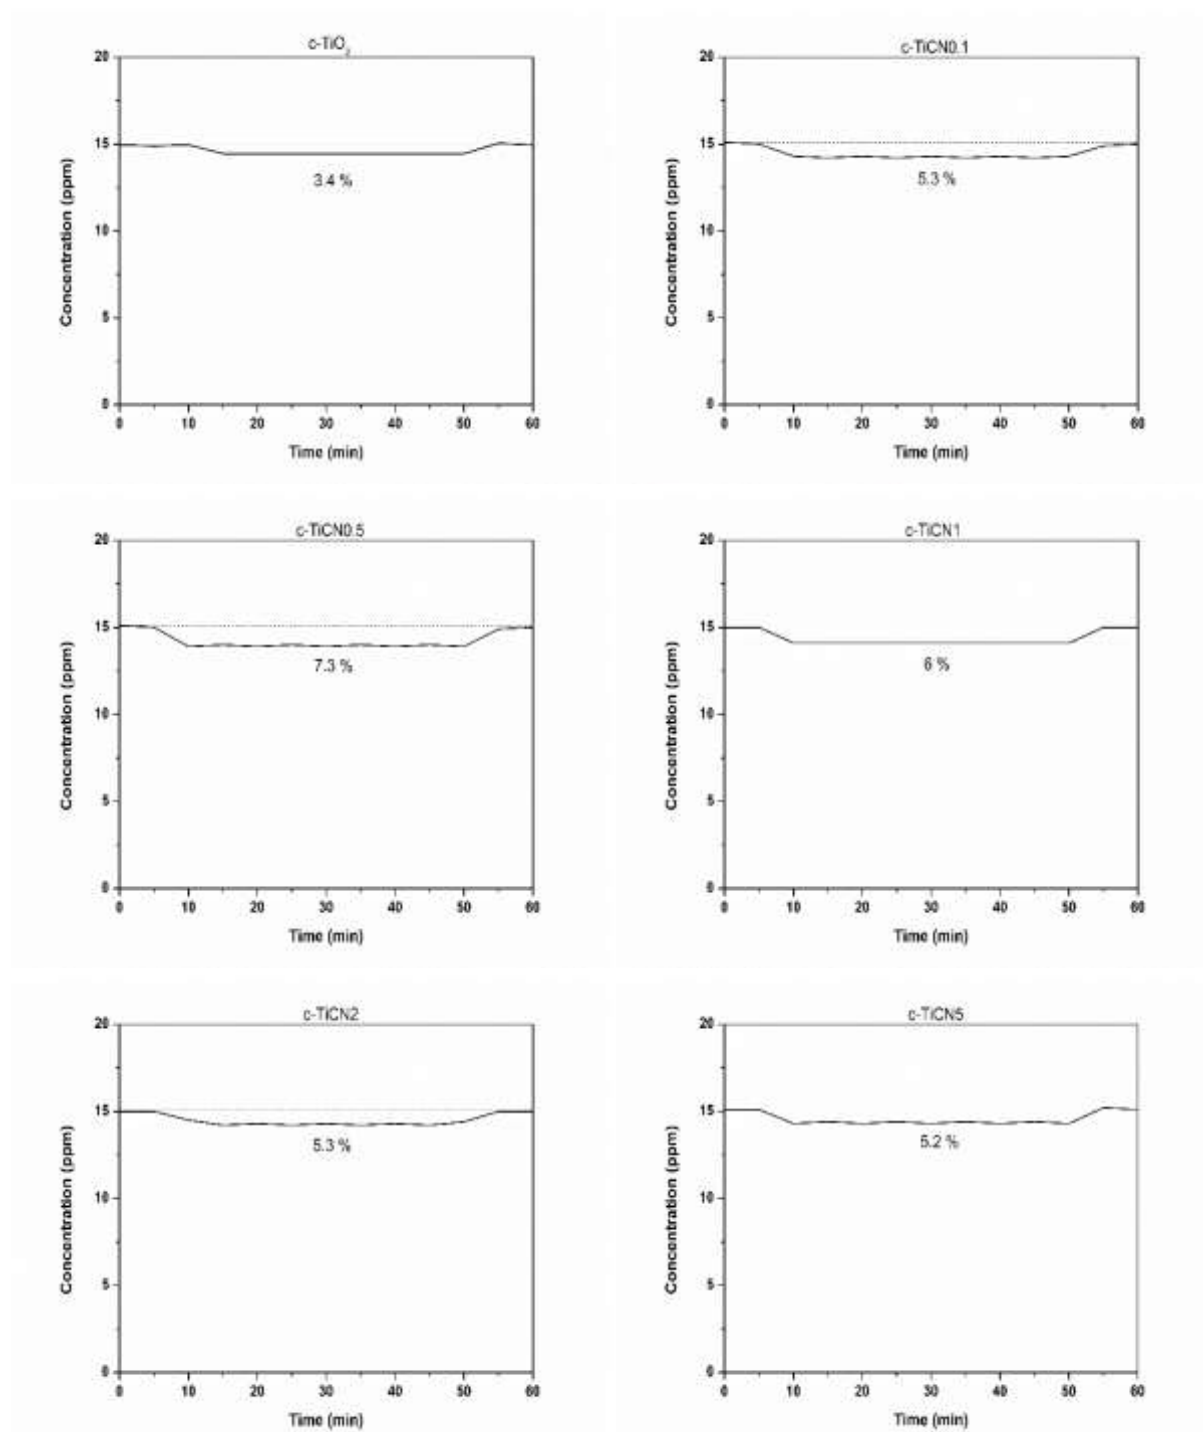

**Figure S3.** Experimental concentration curves of the monitored acetaldehyde gas under visible light irradiation, for the photocatalytic coatings.
